1 **Characterization of the immune resistance of SARS-CoV-2 Mu variant and the**  
2 **immunity induced by Mu infection**

3

4 Keiya Uriu<sup>1#</sup>, Paúl Cárdenas<sup>2#</sup>, Erika Muñoz<sup>2</sup>, Veronica Barragan<sup>2</sup>, Yusuke Kosugi<sup>1</sup>,  
5 Kotaro Shirakawa<sup>3</sup>, Akifumi Takaori-Kondo<sup>3</sup>, Ecuador-COVID19 Consortium, The  
6 Genotype to Phenotype Japan (G2P-Japan) Consortium, Kei Sato<sup>1\*</sup>

7

8 <sup>1</sup> Institute of Medical Science, University of Tokyo, Tokyo, Japan

9 <sup>2</sup> Institute of Microbiology, Universidad San Francisco de Quito, Quito, Ecuador

10 <sup>3</sup> Kyoto University, Kyoto, Japan

11 # Keiya Uriu and Paúl Cárdenas contributed equally to this letter.

12

13 \*Correspondence:

14 [KeiSato@g.ecc.u-tokyo.ac.jp](mailto:KeiSato@g.ecc.u-tokyo.ac.jp) (Kei Sato)

15

16 **Conflict of interest:** The authors declare that no competing interests exist.

17

18 **Abstract**

19 We have revealed that the SARS-CoV-2 Mu variant is highly resistant to COVID-19  
20 convalescent sera and vaccine sera.<sup>1</sup> However, it remains unclear how the immune  
21 resistance of the Mu variant is determined. Also, although the Mu variant is highly  
22 resistant to the sera obtained from COVID-19 convalescent during early pandemic  
23 (i.e., infected with prototypic virus) and vaccinated individuals (i.e., immunized  
24 based on prototypic virus), it was unaddressed how the convalescent sera from  
25 Mu-infected individuals function. In this study, we revealed that the two mutations in  
26 the spike protein of Mu variant, YY144-145TSN and E484K, are responsible for the  
27 potent immune resistance of Mu variant. Additionally, we showed that the  
28 convalescent sera obtained from the Mu-infected individuals can be broadly  
29 antiviral against the Mu variant as well as other SARS-CoV-2 variants of  
30 concern/interest. Our findings suggest that developing novel vaccines based on the  
31 Mu variant can be more effective against a broad range of SARS-CoV-2 variants.

## 32 Text

33 As of October 2021, the WHO defined four variants of concern and two variants of  
34 interest.<sup>2</sup> Mu variant represents the most recently recognized variant of interest and  
35 has spread mainly in some South American countries such as Colombia and  
36 Ecuador.<sup>2</sup> We have recently revealed that the Mu variant shows a pronounced  
37 resistance to antibodies elicited by natural severe acute respiratory syndrome  
38 coronavirus 2 (SARS-CoV-2) infection and the BNT162b2 vaccine.<sup>1</sup> The majority of  
39 Mu variants harbor the T95I and YY144-145TSN mutations in the N-terminal  
40 domain; the R346K, E484K, and N501Y mutations in the receptor-binding domain;  
41 and the D614G, P681H, and D950N mutations in other regions of the spike protein  
42 (**Fig. 1A**). However, it remains unclear which mutations determine the pronounced  
43 resistance of Mu variant to antiviral sera. To address this, we generated a series of  
44 pseudoviruses that harbors the spike protein of the D614G-bearing B.1 lineage  
45 virus (parental virus) bearing with each mutation in the Mu variant. Virus  
46 neutralization assay was performed with the use of serum samples obtained from  
47 15 coronavirus disease 19 convalescents who were infected early in the pandemic  
48 (April 2020) (**Table S1**) and 14 persons who had received the BNT162b2 vaccine  
49 (**Table S2**). As shown in **Fig. 1B** (top), two mutations, YY144-145TSN and E484K,  
50 conferred the resistance to antibodies induced by natural SARS-CoV-2 infection  
51 and vaccination. To verify the effect of these two mutations on the neutralization  
52 resistance, we next generated a series of Mu-based pseudoviruses that lose  
53 respective mutations. Consistent with the gain-of-function experiments based on  
54 the parental virus (**Fig. 1B**, top), the loss-of-function experiments showed that the  
55 spike proteins of Mu variant reverting YY144-145TSN or E484K mutations loses the  
56 neutralization resistance (**Fig. 1B**, bottom). Since the Mu pseudovirus derivative  
57 that loses both YY144-145TSN and E484K mutations almost completely lost the  
58 neutralization resistance (**Fig. 1B**, bottom), our data suggest that the pronounced  
59 resistance of Mu variant against neutralizing antibodies is attributed to these two  
60 mutations.

61 We next assessed the immunological spectrum of the serum samples  
62 obtained from the convalescents who had infected with Mu variant (**Table S3**).  
63 Although the Mu variant was more than 9 times resistant to the sera induced by  
64 natural SARS-CoV-2 infection during early pandemic and vaccination, which is  
65 consistent with our recent report (**Fig. 1C**),<sup>1</sup> the Mu variant did not exhibit resistance  
66 to the sera induced by Mu infection (**Fig. 1D**). Notably, the sera induced by Mu  
67 infection exhibited broad antiviral effect against various variants of concern/interest  
68 (**Fig. 1D**). Altogether, our findings suggest that the use of Mu sequence can be a  
69 good strategy for the next-generation vaccine development.

70 **References**

- 71 1. Uriu K, Kimura I, Shirakawa K, et al. Neutralization of the SARS-CoV-2 Mu  
72 variant by convalescent and vaccine serum. *N Engl J Med* 2021; **in press**.
- 73 2. WHO. “Tracking SARS-CoV-2 variants”.  
74 <https://www.who.int/en/activities/tracking-SARS-CoV-2-variants/>. 2021.

75

76 **Figure**  
77

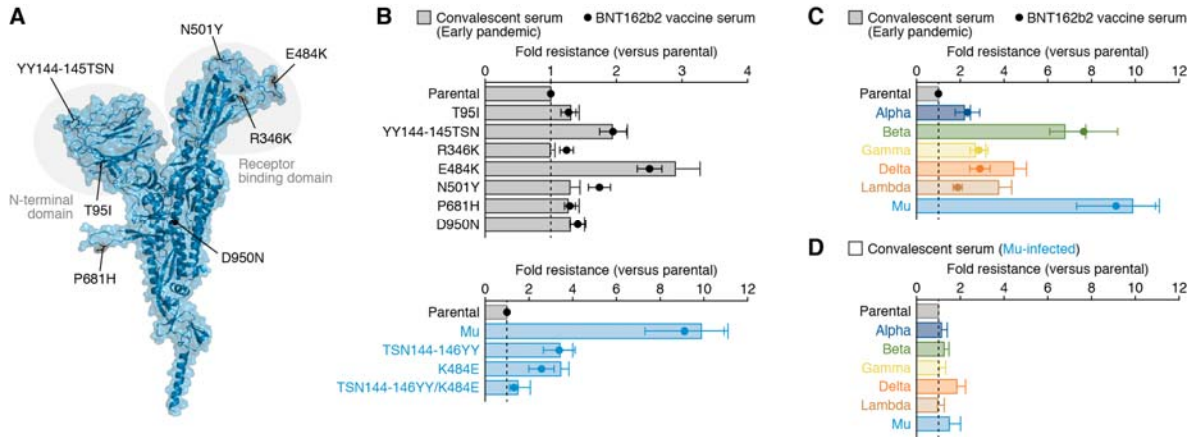

78  
79

80 **Figure 1. Characterization of the immune resistance of the Mu variant.**

81 Panel A shows the position of the mutations in Mu variant. Cartoon and surface  
82 models are overlaid. The mutations in Mu variant are indicated. The structure of  
83 N-terminal domain is shown in **Fig. S1** in the Supplementary Appendix.

84 Panels B to D show the results of virus neutralization assays. Neutralization assays  
85 were performed with the use of pseudoviruses harboring the SARS-CoV-2 spike  
86 proteins of parental virus (the B.1 lineage virus, which harbors the D614G  
87 mutation)-based derivatives (Panel B, top), the spike proteins of Mu-based  
88 derivatives (Panel B, bottom), or the spike proteins of the Alpha, Beta, Gamma,  
89 Delta, Lambda or Mu variants (Panels C and D). Serum samples were obtained  
90 from 15 convalescent persons who had infected with SARS-CoV-2 in the early  
91 pandemic, 14 persons who had received the BNT162b2 vaccine, and 4  
92 convalescent persons who had infected with SARS-CoV-2 Mu variant.

93 In Panels B and C, the heights of the bars (serum samples obtained from the  
94 convalescent persons who had infected with SARS-CoV-2 in the early pandemic)  
95 and the circles (serum samples obtained from the persons who had received the  
96 BNT162b2 vaccine) indicate the average difference in neutralization resistance of  
97 the indicated variants as compared with that of the parental virus.

98 In Panel D, the heights of the bars (serum samples obtained from the convalescent  
99 persons who had infected with Mu variant) indicate the average difference in  
100 neutralization resistance of the indicated variants as compared with that of the  
101 parental virus. The error bars indicate standard error of the mean. The vertical  
102 dashed lines indicate value 1.

103 The assay of each serum sample was performed in triplicate to determine the 50%  
104 neutralization titer. The raw data of the 50% neutralization titer are summarized in

105 **Fig. S2** and **Tables S1-S3** in the Supplementary Appendix. The information  
106 regarding the convalescent donors (sex, age, and dates of testing and sampling)  
107 and vaccinated donors (sex, age, and dates of second vaccination and sampling) of  
108 serum samples are summarized in **Tables S1-S3** in the Supplementary Appendix.
